# Supplementary material for: Social contact patterns relevant to the spread of respiratory infectious diseases in Hong Kong
Source: PubMed Central journal article supplement (PMC5554254; doi:10.1038/s41598-017-08241-1), 2017-08-11
Supplement: 41598_2017_8241_MOESM1_ESM.pdf [file 41598_2017_8241_MOESM1_ESM.pdf]

# **Social contact patterns relevant to the spread of respiratory infectious diseases in Hong Kong**

Kathy Leung<sup>1,a</sup>, Mark Jit<sup>1,2,3,a</sup>, Eric H. Y. Lau<sup>1</sup>, Joseph T. Wu<sup>1\*</sup>

<sup>1</sup> WHO Collaborating Centre for Infectious Disease Epidemiology and Control, School of Public Health, Li Ka Shing Faculty of Medicine, The University of Hong Kong, Hong Kong SAR, People's Republic of China

<sup>2</sup> Department of Infectious Disease Epidemiology, London School of Hygiene and Tropical Medicine, London, United Kingdom

<sup>3</sup> Modelling and Economics Unit, Public Health England, London, United Kingdom

<sup>a</sup> Contributed equally

\*Corresponding author:

Dr. Joseph T. Wu

WHO Collaborating Centre for Infectious Disease Epidemiology and Control

School of Public Health

Li Ka Shing Faculty of Medicine

The University of Hong Kong

Tel: +852 3917 6709

Email: [joewu@hku.hk](mailto:joewu@hku.hk)

## **Supplementary Information**

### **The impact of different social contact data on the estimation of influenza infection attack rates**

We explored whether the difference in social contact patterns between Hong Kong and European countries would result in significant difference in the estimates of age-specific influenza infection attack rates (IARs). In our previous study of the 2009 influenza pandemic <sup>1</sup>, we estimated the age-specific infection attack rates in Hong Kong from a Susceptible-Exposed-Infectious-Removed model constructed based on the European social contact data <sup>2</sup>. We showed that the estimates of age-specific infection attack rates were similar when different contact matrices from the POLYMOD study were used. To investigate whether the IAR estimates are sensitive to the difference between Hong Kong contact data and European contact data, we replicated the study with Hong Kong contact data from this study.

Supplementary Figure S2 compares the IAR estimates across all the age groups when different contact matrices were used. The IAR estimates were largely consistent, except that the IAR of 13-19 years old was slightly higher when Hong Kong contact data were used. In this case study, we showed that the structure of contact matrices had little impact on the age-specific IAR estimates. Given any contact matrix, the parameter “age-specific susceptibility” would be adjusted in the Bayesian inference algorithm accordingly so that similar transmission dynamics could be generated to match the observed transmission patterns. The high age-assortative within-group contact intensity along the diagonal of contact matrices is the most important finding in all the social contact surveys, and plays a major part in the estimation of age-specific infection attack rates and susceptibility.

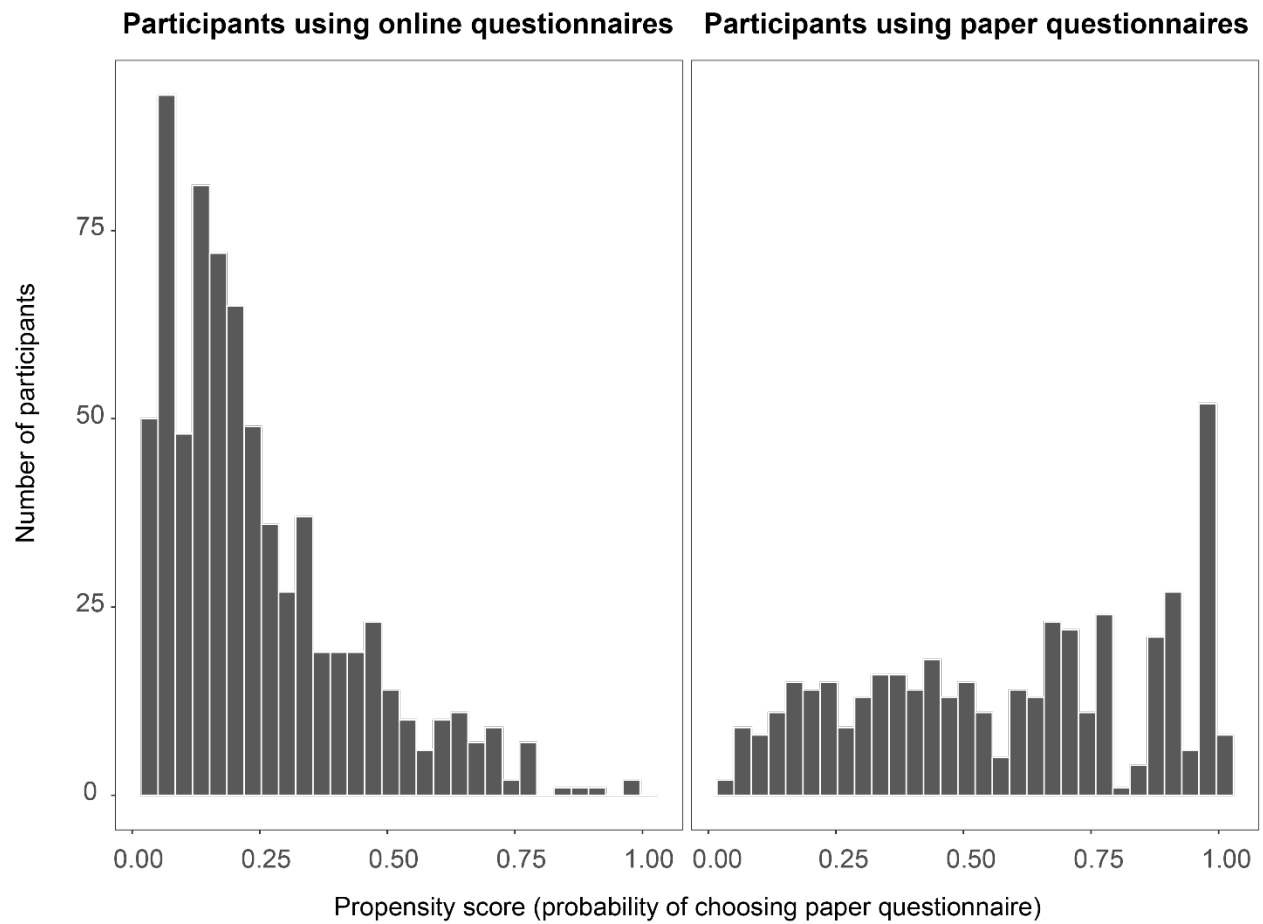

**Supplementary Figure S1. The distribution of estimated propensity scores for mode of questionnaire by the actual type of questionnaire chosen by each participant**

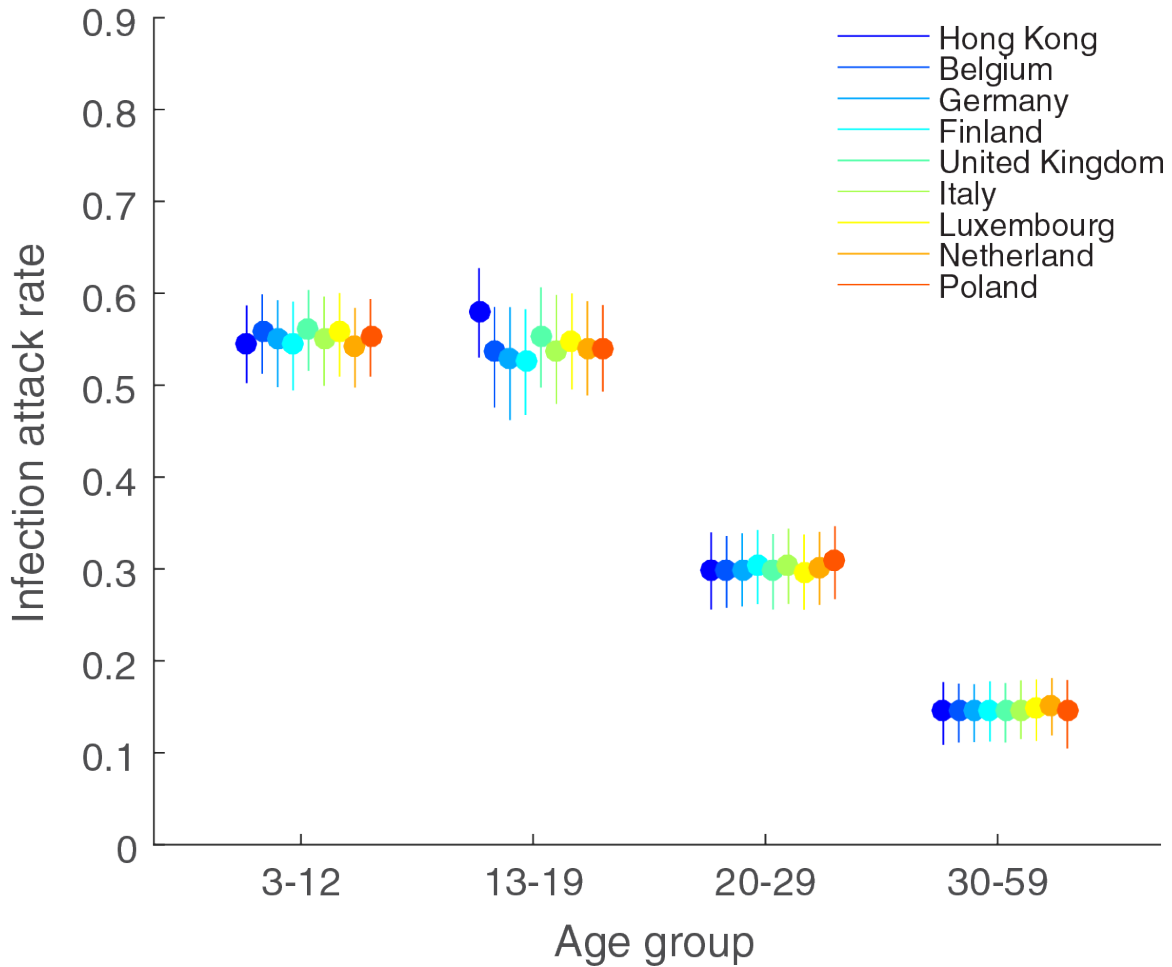

**Supplementary Figure S2. Estimates of age-specific infection attack rates of the 2009 influenza pandemic in Hong Kong when different contact matrices were assumed.**

The Hong Kong contact matrix was constructed with contact data in this manuscript after questionnaire mode was considered in the propensity score analysis. The contact matrices of eight European countries were obtained from Mossong et al <sup>2</sup>.

| Study               | Country or region        | Year of study | Mode of data collection | Mode of questionnaire                                                                                                                                                      | Prospective or retrospective | Include group contacts | Mean number of reported contacts                                            |
|---------------------|--------------------------|---------------|-------------------------|----------------------------------------------------------------------------------------------------------------------------------------------------------------------------|------------------------------|------------------------|-----------------------------------------------------------------------------|
| Beutals             | Belgium                  | 2003          | Self-report             | Online                                                                                                                                                                     | Both                         | No                     | 23.5 on weekdays and 19.5 during weekends among trained university students |
| Mossong             | Eight European countries | 2006          | Self-report             | Paper                                                                                                                                                                      | Not specified                | No                     | 7.95-19.77                                                                  |
| Horby               | Vietnam                  | 2007          | Interview               | Paper                                                                                                                                                                      | Retrospective                | No                     | 7.7                                                                         |
| McCaw               | Australia                | 2008          | Self-report             | Paper and PDA                                                                                                                                                              | Prospective                  | No                     | 20.3-27.5 among 65 adults using both modes                                  |
| Danon               | UK                       | 2009          | Self-report             | Paper and online                                                                                                                                                           | Not specified                | Yes                    | 7.97 (without group contacts)                                               |
| Kucharski and Kwok  | Hong Kong                | 2009          | Interview               | Paper                                                                                                                                                                      | Retrospective                | Yes                    | 18.0-18.6                                                                   |
| Read                | Guangdong                | 2010          | Interview               | Paper                                                                                                                                                                      | Retrospective                | Yes                    | 18.56                                                                       |
| Fu                  | Taiwan                   | 2010          | Interview               | Paper                                                                                                                                                                      | Retrospective                | Not clear              | 12.54                                                                       |
| Johnstone-Robertson | South Africa             | 2010          | Self-report             | Paper                                                                                                                                                                      | Prospective (encouraged)     | No                     | 15.8                                                                        |
| Dodd                | Zambia and South Africa  | 2010-2011     | Interview               | Paper                                                                                                                                                                      | Retrospective                | Both                   | 5.7 (adult participants only, without group contacts)                       |
| Kifle               | Belgium                  | 2010-2011     | Self-report             | Paper                                                                                                                                                                      | Prospective                  | No                     | 13.5                                                                        |
| Ibuka               | Japan                    | 2011          | Self-report             | Paper and online for elderly individuals over 65 years who don't live with younger adults; online for other age groups and elderly aged over 65 living with younger adults | Retrospective                | No                     | 15.3                                                                        |
| Grijalva            | Peru                     | 2011          | Interview               | Paper                                                                                                                                                                      | Retrospective                | No                     | 12                                                                          |
| Kiti                | Kenya                    | 2011          | Self-report             | Paper                                                                                                                                                                      | Prospective (encouraged)     | No                     | 17.7                                                                        |
| Beraud              | France                   | 2012          | Self-report             | Paper                                                                                                                                                                      | Not specified                | Both                   | 19.1 (without group contacts)                                               |

|          |          |      |             |       |                             |    |      |
|----------|----------|------|-------------|-------|-----------------------------|----|------|
| Melegaro | Zimbabwe | 2013 | Self-report | Paper | Prospective<br>(encouraged) | No | 10.8 |
| Ajelli   | Russia   | 2016 | Self-report | Paper | Not specified               | No | 12.2 |

**Supplementary Table S1. Main features of the previous social contact surveys**

We summarized previous population-wide social contact surveys conducted with similar diary design as the POLYMOD study by searching the titles and abstracts of journal articles that have cited Mossong et al <sup>2</sup>. In addition, we also searched the reference list of each article we found to identify additional eligible studies to be included in Table S1.

|                              | <b>Step 1 (relative number of reported contacts)</b> | <b>Step 2 (OR of choosing paper questionnaire)</b> | <b>Step 3 (relative number of reported contacts)</b> |
|------------------------------|------------------------------------------------------|----------------------------------------------------|------------------------------------------------------|
| <b>Gender</b>                |                                                      |                                                    |                                                      |
| Male                         | REF                                                  | REF                                                | REF                                                  |
| Female                       | 1.008 (0.915-1.111)                                  | 1.036 (0.770-1.393)                                | 1.000 (0.978-1.023)                                  |
| <b>Age</b>                   |                                                      |                                                    |                                                      |
| 0-10                         | REF                                                  | REF                                                | REF                                                  |
| 11-20                        | 0.942 (0.766-1.161)                                  | 1.091 (0.602-1.969)                                | 0.926 (0.888-0.967) *                                |
| 21-40                        | 0.895 (0.714-1.123)                                  | 1.711 (0.867-3.406)                                | 0.847 (0.805-0.891) *                                |
| 41-65                        | 1.092 (0.892-1.337)                                  | 6.219 (3.385-11.69) *                              | 0.812 (0.776-0.849) *                                |
| >65                          | 1.190 (0.908-1.565)                                  | 256.5 (65.92-1723) *                               | 0.608 (0.566-0.653) *                                |
| <b>Day of the week</b>       |                                                      |                                                    |                                                      |
| Weekday                      | REF                                                  | REF                                                | REF                                                  |
| Weekend                      | 0.996 (0.892-1.114)                                  | 0.587 (0.415-0.824) *                              | 1.101 (1.074-1.130) *                                |
| <b>Household size</b>        | 1.112 (1.061-1.165) *                                | 1.074 (0.927-1.246)                                | 1.068 (1.059-1.078) *                                |
| <b>Education</b>             |                                                      |                                                    |                                                      |
| Primary or below             | REF                                                  | REF                                                | REF                                                  |
| Secondary                    | 0.870 (0.736-1.026)                                  | 0.318 (0.183-0.540) *                              | 0.992 (0.954-1.032)                                  |
| Post-secondary               | 0.887 (0.741-1.061)                                  | 0.102 (0.057-0.181) *                              | 1.231 (1.179-1.286) *                                |
| <b>Income</b>                |                                                      |                                                    |                                                      |
| 0-9999                       | REF                                                  | REF                                                | REF                                                  |
| 10,000-19,999                | 1.023 (0.867-1.208)                                  | 0.937 (0.576-1.522)                                | 0.987 (0.949-1.027)                                  |
| 20,000-39,999                | 1.130 (0.958-1.331)                                  | 0.577 (0.352-0.944) *                              | 1.184 (1.140-1.230) *                                |
| ≥40,000                      | 1.052 (0.883-1.254)                                  | 0.260 (0.151-0.441) *                              | 1.277 (1.225-1.330) *                                |
| Unknown                      | 0.795 (0.682-0.926) *                                | 0.234 (0.145-0.373) *                              | 0.977 (0.943-1.012)                                  |
| <b>Mode of questionnaire</b> |                                                      |                                                    |                                                      |
| Online                       | -                                                    | -                                                  | REF                                                  |
| Paper                        | -                                                    | -                                                  | 2.321 (2.260-2.383) *                                |

**Supplementary Table S2. Mediation analysis showing mode of questionnaire is a mediator in the causal relationship between demographic characteristics and the number of reported contacts.**

|                        | <b>Standardized difference (%)</b>      |                                        |
|------------------------|-----------------------------------------|----------------------------------------|
|                        | <b>Before propensity score matching</b> | <b>After propensity score matching</b> |
| <b>Gender</b>          | 1.83                                    | 2.79                                   |
| <b>Age</b>             | 16.6                                    | 7.31                                   |
| <b>Day of the week</b> | -18.9                                   | -12.0                                  |
| <b>Household size</b>  | 10.1                                    | 4.92                                   |
| <b>Education</b>       | 16.4                                    | 5.30                                   |
| <b>Income</b>          | 13.2                                    | 4.55                                   |

**Supplementary Table S3. Standardized differences in the demographic covariates used in the propensity score estimation.**



|                                                  | Retrospective participants |                                          | Prospective participants |                                          | Mann-Whitney U test |
|--------------------------------------------------|----------------------------|------------------------------------------|--------------------------|------------------------------------------|---------------------|
|                                                  | Number of participants     | Average number of reported contacts (SD) | Number of participants   | Average number of reported contacts (SD) | p-value             |
| <b>Online questionnaire</b>                      |                            |                                          |                          |                                          |                     |
| By the time between first and last contact entry | 704                        | 5.00 (4.46)                              | 9                        | 9.33 (3.24)                              | <0.01*              |
| By the time between first and last access        | 553                        | 5.04 (4.45)                              | 40                       | 6.85 (6.14)                              | 0.035*              |
| <b>Paper questionnaire</b>                       |                            |                                          |                          |                                          |                     |
| By the time between first and last contact entry | 420                        | 9.89 (8.06)                              | 6                        | 13.67 (12.60)                            | 0.59                |

**Supplementary Table S4. Number of reported contacts among prospective and retrospective participants.**

|                             |                        | Average number of reported contacts by contact type |      |                |        |         |
|-----------------------------|------------------------|-----------------------------------------------------|------|----------------|--------|---------|
|                             | Number of participants | All                                                 | Home | School or work | Others | Unknown |
| <b>Paper questionnaire</b>  |                        |                                                     |      |                |        |         |
| <b>Age 0-18</b>             |                        |                                                     |      |                |        |         |
| Weekday                     | 61                     | 11.08                                               | 3.70 | 4.18           | 3.13   | 0.07    |
| Weekend                     | 31                     | 13.26                                               | 4.42 | 6.03           | 2.26   | 0.58    |
| <b>Age 19-30</b>            |                        |                                                     |      |                |        |         |
| Weekday                     | 24                     | 13.08                                               | 2.25 | 8.25           | 2.42   | 0.17    |
| Weekend                     | 5                      | 8.40                                                | 3.20 | 2.20           | 2.80   | 0.20    |
| <b>Age 31-50</b>            |                        |                                                     |      |                |        |         |
| Weekday                     | 74                     | 11.32                                               | 2.64 | 4.66           | 3.65   | 0.38    |
| Weekend                     | 20                     | 12.10                                               | 1.70 | 4.30           | 4.55   | 1.55    |
| <b>Age &gt;50</b>           |                        |                                                     |      |                |        |         |
| Weekday                     | 180                    | 10.13                                               | 2.31 | 2.38           | 4.89   | 0.56    |
| Weekend                     | 35                     | 7.06                                                | 1.46 | 2.60           | 2.49   | 0.51    |
| <b>Online questionnaire</b> |                        |                                                     |      |                |        |         |
| <b>Age 0-18</b>             |                        |                                                     |      |                |        |         |
| Weekday                     | 157                    | 4.58                                                | 2.31 | 1.44           | 0.82   | 0.01    |
| Weekend                     | 72                     | 5.42                                                | 2.18 | 2.14           | 1.04   | 0.06    |
| <b>Age 19-30</b>            |                        |                                                     |      |                |        |         |
| Weekday                     | 122                    | 4.89                                                | 1.96 | 2.23           | 0.68   | 0.02    |
| Weekend                     | 42                     | 5.38                                                | 1.79 | 2.24           | 1.33   | 0.02    |
| <b>Age 31-50</b>            |                        |                                                     |      |                |        |         |
| Weekday                     | 171                    | 5.70                                                | 2.21 | 1.78           | 1.71   | 0.01    |
| Weekend                     | 70                     | 5.39                                                | 1.84 | 2.09           | 1.43   | 0.03    |
| <b>Age &gt;50</b>           |                        |                                                     |      |                |        |         |
| Weekday                     | 58                     | 4.64                                                | 1.47 | 1.31           | 1.86   | 0.00    |
| Weekend                     | 27                     | 4.22                                                | 1.37 | 1.07           | 1.59   | 0.19    |

**Supplementary Table S5. Average number of reported contacts by age and contact member type on weekdays (Mon-Fri) and during weekends (Sat-Sun)**

|                    |       | Age of contact |      |       |       |       |       |       |       |       |       |       |       |       |       |      |
|--------------------|-------|----------------|------|-------|-------|-------|-------|-------|-------|-------|-------|-------|-------|-------|-------|------|
|                    |       | 0-5            | 6-10 | 11-15 | 16-20 | 21-25 | 26-30 | 31-35 | 36-40 | 41-45 | 46-50 | 51-55 | 56-60 | 61-65 | 66-70 | >70  |
| Age of participant | 0-5   | 1.97           | 0.46 | 0.13  | 0.08  | 0.46  | 0.70  | 1.15  | 0.68  | 0.49  | 0.21  | 0.27  | 0.32  | 0.33  | 0.10  | 0.04 |
|                    | 6-10  | 0.35           | 2.99 | 0.63  | 0.18  | 0.22  | 0.44  | 0.71  | 0.85  | 0.79  | 0.39  | 0.14  | 0.08  | 0.25  | 0.14  | 0.17 |
|                    | 11-15 | 0.04           | 0.24 | 2.70  | 0.33  | 0.28  | 0.17  | 0.26  | 0.54  | 0.63  | 0.47  | 0.31  | 0.07  | 0.10  | 0.04  | 0.10 |
|                    | 16-20 | 0.03           | 0.08 | 0.38  | 1.55  | 0.73  | 0.23  | 0.31  | 0.24  | 0.36  | 0.50  | 0.40  | 0.19  | 0.07  | 0.01  | 0.01 |
|                    | 21-25 | 0.05           | 0.06 | 0.13  | 0.76  | 1.40  | 0.67  | 0.70  | 0.43  | 0.61  | 0.48  | 0.62  | 0.39  | 0.35  | 0.02  | 0.00 |
|                    | 26-30 | 0.23           | 0.04 | 0.01  | 0.23  | 0.50  | 0.93  | 0.83  | 0.47  | 0.40  | 0.33  | 0.26  | 0.33  | 0.30  | 0.04  | 0.07 |
|                    | 31-35 | 0.36           | 0.39 | 0.22  | 0.23  | 0.61  | 0.78  | 1.33  | 0.52  | 0.69  | 0.41  | 0.41  | 0.32  | 0.60  | 0.11  | 0.17 |
|                    | 36-40 | 0.46           | 0.49 | 0.28  | 0.13  | 0.31  | 0.49  | 0.64  | 0.90  | 0.94  | 0.29  | 0.28  | 0.14  | 0.31  | 0.08  | 0.13 |
|                    | 41-45 | 0.17           | 0.31 | 0.58  | 0.19  | 0.35  | 0.56  | 0.78  | 0.86  | 1.23  | 1.09  | 0.60  | 0.26  | 0.32  | 0.06  | 0.12 |
|                    | 46-50 | 0.05           | 0.22 | 0.32  | 0.44  | 0.53  | 0.62  | 0.83  | 0.92  | 1.16  | 1.28  | 1.01  | 0.40  | 0.63  | 0.02  | 0.18 |
|                    | 51-55 | 0.10           | 0.18 | 0.24  | 0.35  | 0.63  | 0.45  | 0.89  | 0.47  | 0.84  | 1.08  | 1.04  | 0.54  | 0.36  | 0.08  | 0.20 |
|                    | 56-60 | 0.65           | 0.07 | 0.10  | 0.21  | 0.43  | 0.59  | 0.88  | 0.74  | 1.15  | 0.88  | 1.57  | 0.96  | 0.79  | 0.31  | 0.40 |
|                    | 61-65 | 0.15           | 0.04 | 0.07  | 0.04  | 0.27  | 0.40  | 0.58  | 0.58  | 0.42  | 0.48  | 0.67  | 0.90  | 0.77  | 0.48  | 0.22 |
|                    | 66-70 | 0.37           | 0.00 | 0.15  | 0.07  | 0.41  | 0.52  | 0.67  | 0.59  | 0.67  | 0.30  | 0.52  | 0.59  | 0.96  | 0.37  | 0.33 |
| >70                | 0.06  | 0.03           | 0.00 | 0.37  | 0.26  | 0.46  | 0.60  | 0.80  | 0.89  | 0.40  | 0.29  | 0.57  | 1.03  | 0.77  | 1.17  |      |

**Supplementary Table S6a. Contact matrix of all reported contacts consisting of the mean number of contacts per day per participant (similar as Table S5 of Mossong et al)**

|                    |       | Age of contact |      |       |       |       |       |       |       |       |       |       |       |       |       |      |
|--------------------|-------|----------------|------|-------|-------|-------|-------|-------|-------|-------|-------|-------|-------|-------|-------|------|
|                    |       | 0-5            | 6-10 | 11-15 | 16-20 | 21-25 | 26-30 | 31-35 | 36-40 | 41-45 | 46-50 | 51-55 | 56-60 | 61-65 | 66-70 | >70  |
| Age of participant | 0-5   | 3.17           | 0.58 | 0.25  | 0.14  | 0.67  | 0.81  | 1.67  | 0.75  | 0.83  | 0.25  | 0.44  | 0.61  | 0.56  | 0.19  | 0.11 |
|                    | 6-10  | 0.62           | 5.07 | 0.83  | 0.38  | 0.24  | 0.62  | 0.79  | 0.97  | 1.21  | 0.62  | 0.17  | 0.03  | 0.24  | 0.24  | 0.38 |
|                    | 11-15 | 0.05           | 0.71 | 5.24  | 0.33  | 0.48  | 0.19  | 0.71  | 0.95  | 1.29  | 0.48  | 0.67  | 0.00  | 0.14  | 0.19  | 0.38 |
|                    | 16-20 | 0.00           | 0.08 | 0.54  | 3.46  | 2.92  | 0.23  | 1.23  | 0.31  | 1.00  | 0.77  | 1.23  | 0.31  | 0.00  | 0.00  | 0.08 |
|                    | 21-25 | 0.13           | 0.06 | 0.25  | 0.25  | 2.50  | 1.06  | 2.19  | 1.13  | 2.06  | 0.38  | 1.44  | 0.88  | 0.69  | 0.06  | 0.00 |
|                    | 26-30 | 0.00           | 0.00 | 0.00  | 0.80  | 1.00  | 3.00  | 1.20  | 0.20  | 1.00  | 0.60  | 0.40  | 0.20  | 0.40  | 0.40  | 0.40 |
|                    | 31-35 | 0.24           | 0.38 | 0.62  | 0.19  | 0.95  | 1.29  | 2.81  | 0.57  | 1.24  | 0.38  | 0.48  | 0.38  | 0.95  | 0.10  | 0.33 |
|                    | 36-40 | 1.00           | 0.07 | 0.14  | 0.21  | 0.21  | 0.36  | 1.21  | 1.00  | 1.86  | 0.57  | 0.79  | 0.36  | 0.64  | 0.36  | 0.57 |
|                    | 41-45 | 0.26           | 0.61 | 0.52  | 0.35  | 0.52  | 0.96  | 1.13  | 1.30  | 2.17  | 1.83  | 1.17  | 0.61  | 0.09  | 0.04  | 0.30 |
|                    | 46-50 | 0.10           | 0.40 | 0.38  | 0.45  | 0.60  | 0.93  | 1.23  | 1.55  | 2.05  | 2.08  | 1.75  | 0.68  | 0.98  | 0.05  | 0.28 |
|                    | 51-55 | 0.17           | 0.37 | 0.39  | 0.41  | 0.95  | 0.63  | 1.46  | 0.56  | 1.32  | 1.10  | 1.76  | 0.85  | 0.44  | 0.17  | 0.37 |
|                    | 56-60 | 0.83           | 0.10 | 0.13  | 0.23  | 0.50  | 0.71  | 1.08  | 0.94  | 1.48  | 1.04  | 2.10  | 1.23  | 0.94  | 0.42  | 0.54 |
|                    | 61-65 | 0.17           | 0.05 | 0.08  | 0.03  | 0.28  | 0.42  | 0.62  | 0.63  | 0.48  | 0.50  | 0.68  | 0.88  | 0.80  | 0.53  | 0.25 |
|                    | 66-70 | 0.38           | 0.00 | 0.15  | 0.08  | 0.42  | 0.54  | 0.69  | 0.58  | 0.65  | 0.31  | 0.54  | 0.62  | 1.00  | 0.38  | 0.35 |
| >70                | 0.06  | 0.03           | 0.00 | 0.37  | 0.26  | 0.46  | 0.60  | 0.80  | 0.89  | 0.40  | 0.29  | 0.57  | 1.03  | 0.77  | 1.17  |      |

**Supplementary Table S6b. Contact matrix of reported contacts from paper questionnaires consisting of the mean number of contacts per day per participant (similar as Table S5 of Mossong et al)**

|                    |       | Age of contact |      |       |       |       |       |       |       |       |       |       |       |       |       |      |
|--------------------|-------|----------------|------|-------|-------|-------|-------|-------|-------|-------|-------|-------|-------|-------|-------|------|
|                    |       | 0-5            | 6-10 | 11-15 | 16-20 | 21-25 | 26-30 | 31-35 | 36-40 | 41-45 | 46-50 | 51-55 | 56-60 | 61-65 | 66-70 | >70  |
| Age of participant | 0-5   | 1.18           | 0.38 | 0.05  | 0.04  | 0.33  | 0.64  | 0.82  | 0.64  | 0.27  | 0.18  | 0.16  | 0.13  | 0.18  | 0.04  | 0.00 |
|                    | 6-10  | 0.16           | 1.58 | 0.49  | 0.05  | 0.21  | 0.33  | 0.65  | 0.77  | 0.51  | 0.23  | 0.12  | 0.12  | 0.26  | 0.07  | 0.02 |
|                    | 11-15 | 0.04           | 0.11 | 1.97  | 0.33  | 0.22  | 0.16  | 0.12  | 0.42  | 0.44  | 0.47  | 0.21  | 0.10  | 0.08  | 0.00  | 0.01 |
|                    | 16-20 | 0.03           | 0.09 | 0.36  | 1.29  | 0.43  | 0.23  | 0.18  | 0.23  | 0.28  | 0.46  | 0.29  | 0.17  | 0.09  | 0.01  | 0.00 |
|                    | 21-25 | 0.03           | 0.06 | 0.10  | 0.88  | 1.15  | 0.57  | 0.35  | 0.26  | 0.26  | 0.50  | 0.43  | 0.28  | 0.26  | 0.01  | 0.00 |
|                    | 26-30 | 0.25           | 0.05 | 0.02  | 0.18  | 0.46  | 0.77  | 0.80  | 0.49  | 0.35  | 0.31  | 0.25  | 0.34  | 0.29  | 0.02  | 0.05 |
|                    | 31-35 | 0.39           | 0.39 | 0.11  | 0.24  | 0.51  | 0.64  | 0.91  | 0.50  | 0.54  | 0.42  | 0.39  | 0.30  | 0.50  | 0.11  | 0.12 |
|                    | 36-40 | 0.34           | 0.58 | 0.31  | 0.11  | 0.33  | 0.52  | 0.52  | 0.88  | 0.73  | 0.23  | 0.17  | 0.09  | 0.23  | 0.02  | 0.03 |
|                    | 41-45 | 0.13           | 0.19 | 0.61  | 0.13  | 0.28  | 0.39  | 0.63  | 0.67  | 0.83  | 0.78  | 0.35  | 0.11  | 0.43  | 0.07  | 0.04 |
|                    | 46-50 | 0.00           | 0.06 | 0.28  | 0.43  | 0.47  | 0.36  | 0.49  | 0.38  | 0.40  | 0.60  | 0.38  | 0.17  | 0.34  | 0.00  | 0.11 |
|                    | 51-55 | 0.04           | 0.02 | 0.10  | 0.29  | 0.35  | 0.29  | 0.40  | 0.40  | 0.44  | 1.06  | 0.44  | 0.27  | 0.29  | 0.00  | 0.06 |
|                    | 56-60 | 0.20           | 0.00 | 0.05  | 0.15  | 0.25  | 0.30  | 0.40  | 0.25  | 0.35  | 0.50  | 0.30  | 0.30  | 0.45  | 0.05  | 0.05 |
|                    | 61-65 | 0.08           | 0.00 | 0.00  | 0.08  | 0.23  | 0.31  | 0.38  | 0.31  | 0.15  | 0.38  | 0.62  | 1.00  | 0.62  | 0.23  | 0.08 |
|                    | 66-70 | 0.00           | 0.00 | 0.00  | 0.00  | 0.00  | 0.00  | 0.00  | 0.00  | 1.00  | 1.00  | 0.00  | 0.00  | 0.00  | 0.00  | 0.00 |
| >70                | 0.00  | 0.00           | 0.00 | 0.00  | 0.00  | 0.00  | 0.00  | 0.00  | 0.00  | 0.00  | 0.00  | 0.00  | 0.00  | 0.00  | 0.00  |      |

**Supplementary Table S6c. Contact matrix of reported contacts from online questionnaires consisting of the mean number of contacts per day per participant (similar as Table S5 of Mossong et al)**

|                    |       | Age of contact |      |       |       |       |       |       |       |       |       |       |       |       |       |      |
|--------------------|-------|----------------|------|-------|-------|-------|-------|-------|-------|-------|-------|-------|-------|-------|-------|------|
|                    |       | 0-5            | 6-10 | 11-15 | 16-20 | 21-25 | 26-30 | 31-35 | 36-40 | 41-45 | 46-50 | 51-55 | 56-60 | 61-65 | 66-70 | >70  |
| Age of participant | 0-5   | 3.11           | 0.51 | 0.14  | 0.07  | 0.67  | 0.86  | 1.58  | 0.85  | 0.71  | 0.21  | 0.34  | 0.50  | 0.46  | 0.13  | 0.05 |
|                    | 6-10  | 0.43           | 3.50 | 0.77  | 0.27  | 0.22  | 0.48  | 0.86  | 0.90  | 0.98  | 0.48  | 0.15  | 0.06  | 0.22  | 0.17  | 0.27 |
|                    | 11-15 | 0.05           | 0.42 | 6.56  | 0.37  | 0.47  | 0.28  | 0.61  | 0.72  | 1.18  | 0.73  | 0.61  | 0.06  | 0.11  | 0.07  | 0.37 |
|                    | 16-20 | 0.02           | 0.05 | 0.49  | 2.35  | 1.47  | 0.23  | 0.69  | 0.23  | 0.63  | 0.71  | 0.79  | 0.16  | 0.05  | 0.00  | 0.04 |
|                    | 21-25 | 0.08           | 0.07 | 0.16  | 0.53  | 2.16  | 0.95  | 1.54  | 0.68  | 1.37  | 0.45  | 1.04  | 0.89  | 0.49  | 0.02  | 0.00 |
|                    | 26-30 | 0.16           | 0.02 | 0.01  | 0.59  | 0.45  | 1.43  | 0.76  | 0.38  | 0.65  | 0.32  | 0.17  | 0.21  | 0.40  | 0.23  | 0.16 |
|                    | 31-35 | 0.38           | 0.28 | 0.84  | 0.18  | 0.80  | 1.03  | 2.32  | 0.58  | 0.92  | 0.49  | 0.51  | 0.34  | 0.79  | 0.12  | 0.23 |
|                    | 36-40 | 0.45           | 0.31 | 0.23  | 0.14  | 0.23  | 0.40  | 0.78  | 0.86  | 1.08  | 0.33  | 0.33  | 0.17  | 0.28  | 0.13  | 0.17 |
|                    | 41-45 | 0.12           | 0.23 | 0.42  | 0.13  | 0.32  | 0.64  | 0.76  | 0.65  | 1.15  | 0.86  | 0.70  | 0.31  | 0.22  | 0.05  | 0.08 |
|                    | 46-50 | 0.06           | 0.19 | 0.30  | 0.38  | 0.41  | 0.62  | 0.99  | 0.84  | 1.14  | 0.98  | 0.82  | 0.50  | 0.53  | 0.01  | 0.14 |
|                    | 51-55 | 0.07           | 0.14 | 0.26  | 0.34  | 0.49  | 0.55  | 0.84  | 0.47  | 0.77  | 1.25  | 0.97  | 0.51  | 0.33  | 0.07  | 0.20 |
|                    | 56-60 | 0.47           | 0.06 | 0.08  | 0.16  | 0.41  | 0.51  | 0.66  | 0.63  | 0.82  | 0.70  | 1.18  | 0.73  | 0.65  | 0.41  | 0.31 |
|                    | 61-65 | 0.10           | 0.03 | 0.04  | 0.04  | 0.23  | 0.36  | 0.40  | 0.38  | 0.30  | 0.42  | 0.51  | 0.80  | 0.61  | 0.35  | 0.18 |
|                    | 66-70 | 0.21           | 0.00 | 0.09  | 0.05  | 0.23  | 0.34  | 0.41  | 0.51  | 0.57  | 0.19  | 0.32  | 0.39  | 0.67  | 0.26  | 0.18 |
| >70                | 0.03  | 0.02           | 0.00 | 0.22  | 0.16  | 0.31  | 0.38  | 0.54  | 0.54  | 0.26  | 0.19  | 0.33  | 0.55  | 0.44  | 0.66  |      |

**Supplementary Table S6d. Contact matrix of reported contacts weighted by IPTW, consisting of the mean number of contacts per day per participant (similar as Table S5 of Mossong et al)**

### **Supplementary Text S1. Sample paper questionnaire in English**

We showed only two contact entries in Part 3 Contact Diary. There were 100 entries in the actual paper questionnaire we provided to the participants. In the online questionnaire, a dynamic table of contact diary was provided: one additional row of contact entry was shown when participants clicked “add contact”.

# Social contact survey relevant to the spread of infectious diseases

Name: \_\_\_\_\_

Participant ID: \_\_\_\_\_

Assigned date: \_\_\_\_ \_\_\_\_ (DD) / \_\_\_\_ \_\_\_\_ (MM)

Page 1

## INTRODUCTION

Thank you for participating in our study "Population-based survey on patterns of social contacts relevant to the spread of infectious diseases in Hong Kong".

The questionnaire consists of 3 sections:

- Your demographic data
  - Information about persons you usually have contact with
  - Information about contacts you have made during the assigned date
- 
- I give permission to the investigators to contact me within 12 months for potential follow-up for this study. Please provide your email address, phone number or mailing address.

Email: \_\_\_\_\_

Phone: \_\_\_\_\_

Letter: \_\_\_\_\_



# Social contact survey relevant to the spread of infectious diseases

Name: \_\_\_\_\_

Participant ID: \_\_\_\_\_

Assigned date: \_\_\_\_\_ (DD) / \_\_\_\_\_ (MM)

Page 2

## PART 1: DEMOGRAPHIC DATA

### 1. Please provide your age OR age range:

Age: \_\_\_\_\_ Years (Please fill in your age)

Age range (Please select your age range below):

|                                |                                |                                        |                                     |                                              |                                |
|--------------------------------|--------------------------------|----------------------------------------|-------------------------------------|----------------------------------------------|--------------------------------|
| <input type="checkbox"/> 0-5   | <input type="checkbox"/> 6-10  | <input type="checkbox"/> 11-15         | <input type="checkbox"/> 16-20      | <input type="checkbox"/> 21-25               | <input type="checkbox"/> 26-30 |
| <input type="checkbox"/> 31-35 | <input type="checkbox"/> 36-40 | <input type="checkbox"/> 41-45         | <input type="checkbox"/> 46-50      | <input type="checkbox"/> 51-55               | <input type="checkbox"/> 56-60 |
| <input type="checkbox"/> 61-65 | <input type="checkbox"/> >65   | <input type="checkbox"/> Others: _____ | <input type="checkbox"/> Don't know | <input type="checkbox"/> Unwilling to answer |                                |

### 2. Sex:

Male  Female  Unwilling to answer

### 3. Please select your working status:

Full-time  Part-time  Unwilling to answer

Please select your working role:

|                                          |                                        |                                        |                                              |                                      |
|------------------------------------------|----------------------------------------|----------------------------------------|----------------------------------------------|--------------------------------------|
| <input type="checkbox"/> Employees       | <input type="checkbox"/> Employers     | <input type="checkbox"/> Self-employed | <input type="checkbox"/> Students            | <input type="checkbox"/> Home-makers |
| <input type="checkbox"/> Retired persons | <input type="checkbox"/> Others: _____ | <input type="checkbox"/> Don't know    | <input type="checkbox"/> Unwilling to answer |                                      |

### 4. Highest level of education attained (completed):

|                                           |                                     |                                              |
|-------------------------------------------|-------------------------------------|----------------------------------------------|
| <input type="checkbox"/> Primary or below | <input type="checkbox"/> Secondary  | <input type="checkbox"/> Post-secondary      |
| <input type="checkbox"/> Others: _____    | <input type="checkbox"/> Don't know | <input type="checkbox"/> Unwilling to answer |

### 5. Please select to provide your individual OR household monthly income:

Individual income  Household income

Please provide the range of monthly income:

|                                        |                                        |                                        |                                              |                                        |
|----------------------------------------|----------------------------------------|----------------------------------------|----------------------------------------------|----------------------------------------|
| <input type="checkbox"/> 0-5,999       | <input type="checkbox"/> 6,000-9,999   | <input type="checkbox"/> 10,000-14,999 | <input type="checkbox"/> 15,000-19,999       | <input type="checkbox"/> 20,000-24,999 |
| <input type="checkbox"/> 25,000-29,999 | <input type="checkbox"/> 30,000-39,999 | <input type="checkbox"/> 40,000-59,999 | <input type="checkbox"/> 60,000-79,999       | <input type="checkbox"/> 80,000-99,999 |
| <input type="checkbox"/> ≥100,000      | <input type="checkbox"/> Others: _____ | <input type="checkbox"/> Don't know    | <input type="checkbox"/> Unwilling to answer |                                        |

### 6. Place of birth:

Hong Kong  Mainland China  Others: \_\_\_\_\_  Don't know  Unwilling to answer

### 7. District you are living in:

|                                              |                                       |                                        |                                       |                                              |
|----------------------------------------------|---------------------------------------|----------------------------------------|---------------------------------------|----------------------------------------------|
| <input type="checkbox"/> Central and Western | <input type="checkbox"/> Eastern      | <input type="checkbox"/> Southern      | <input type="checkbox"/> Wan Chai     | <input type="checkbox"/> Kowloon City        |
| <input type="checkbox"/> Kwun Tong           | <input type="checkbox"/> Sham Shui Po | <input type="checkbox"/> Yau Tsim Mong | <input type="checkbox"/> Wong Tai Sin | <input type="checkbox"/> Islands             |
| <input type="checkbox"/> Kwai Tsing          | <input type="checkbox"/> North        | <input type="checkbox"/> Sai Kung      | <input type="checkbox"/> Sha Tin      | <input type="checkbox"/> Tai Po              |
| <input type="checkbox"/> Tsuen Wan           | <input type="checkbox"/> Tuen Mun     | <input type="checkbox"/> Yuen Long     | <input type="checkbox"/> Don't know   | <input type="checkbox"/> Unwilling to answer |

### 8. Ethnicity:

|                                    |                                     |                                        |                                     |                                              |
|------------------------------------|-------------------------------------|----------------------------------------|-------------------------------------|----------------------------------------------|
| <input type="checkbox"/> Chinese   | <input type="checkbox"/> Indonesian | <input type="checkbox"/> Filipino      | <input type="checkbox"/> White      | <input type="checkbox"/> Indian              |
| <input type="checkbox"/> Pakistani | <input type="checkbox"/> Nepalese   | <input type="checkbox"/> Others: _____ | <input type="checkbox"/> Don't know | <input type="checkbox"/> Unwilling to answer |

### 9. Are you a Hong Kong permanent resident:

Yes  No  Unwilling to answer

# Social contact survey relevant to the spread of infectious diseases

Name: \_\_\_\_\_  
 Participant ID: \_\_\_\_\_  
 Assigned date: \_\_\_\_\_ (DD) / \_\_\_\_\_ (MM)

## PART 2: USUAL CONTACT INFORMATION

### 10. How many people do you live with (sleep in the place more than 4 nights per week)?

Number of persons:  persons Type:  Household  Student residential hall  Shared apartment

### 11. What are the age, sex and relationship to you for people who you reported in Question 10? Please list the 10 most important people if there is not enough space.

| Persons who live with you |                                         |                                                                    |                                                                                                                                                                                                                                                                                                                                                                                                                                             |  |  |  |
|---------------------------|-----------------------------------------|--------------------------------------------------------------------|---------------------------------------------------------------------------------------------------------------------------------------------------------------------------------------------------------------------------------------------------------------------------------------------------------------------------------------------------------------------------------------------------------------------------------------------|--|--|--|
| 1                         | Age: _____ years or _____ - _____ years | Sex: <input type="checkbox"/> Male <input type="checkbox"/> Female | Relationship: <input type="checkbox"/> Spouse/partner <input type="checkbox"/> Parent <input type="checkbox"/> Child <input type="checkbox"/> Sibling <input type="checkbox"/> Grandparent <input type="checkbox"/> Grandchild<br><input type="checkbox"/> Classmate <input type="checkbox"/> Colleague <input type="checkbox"/> Boy/girl friend <input type="checkbox"/> Others <input type="checkbox"/> No relation / Unwilling to answer |  |  |  |
| 2                         | Age: _____ years or _____ - _____ years | Sex: <input type="checkbox"/> Male <input type="checkbox"/> Female | Relationship: <input type="checkbox"/> Spouse/partner <input type="checkbox"/> Parent <input type="checkbox"/> Child <input type="checkbox"/> Sibling <input type="checkbox"/> Grandparent <input type="checkbox"/> Grandchild<br><input type="checkbox"/> Classmate <input type="checkbox"/> Colleague <input type="checkbox"/> Boy/girl friend <input type="checkbox"/> Others <input type="checkbox"/> No relation / Unwilling to answer |  |  |  |
| 3                         | Age: _____ years or _____ - _____ years | Sex: <input type="checkbox"/> Male <input type="checkbox"/> Female | Relationship: <input type="checkbox"/> Spouse/partner <input type="checkbox"/> Parent <input type="checkbox"/> Child <input type="checkbox"/> Sibling <input type="checkbox"/> Grandparent <input type="checkbox"/> Grandchild<br><input type="checkbox"/> Classmate <input type="checkbox"/> Colleague <input type="checkbox"/> Boy/girl friend <input type="checkbox"/> Others <input type="checkbox"/> No relation / Unwilling to answer |  |  |  |
| 4                         | Age: _____ years or _____ - _____ years | Sex: <input type="checkbox"/> Male <input type="checkbox"/> Female | Relationship: <input type="checkbox"/> Spouse/partner <input type="checkbox"/> Parent <input type="checkbox"/> Child <input type="checkbox"/> Sibling <input type="checkbox"/> Grandparent <input type="checkbox"/> Grandchild<br><input type="checkbox"/> Classmate <input type="checkbox"/> Colleague <input type="checkbox"/> Boy/girl friend <input type="checkbox"/> Others <input type="checkbox"/> No relation / Unwilling to answer |  |  |  |
| 5                         | Age: _____ years or _____ - _____ years | Sex: <input type="checkbox"/> Male <input type="checkbox"/> Female | Relationship: <input type="checkbox"/> Spouse/partner <input type="checkbox"/> Parent <input type="checkbox"/> Child <input type="checkbox"/> Sibling <input type="checkbox"/> Grandparent <input type="checkbox"/> Grandchild<br><input type="checkbox"/> Classmate <input type="checkbox"/> Colleague <input type="checkbox"/> Boy/girl friend <input type="checkbox"/> Others <input type="checkbox"/> No relation / Unwilling to answer |  |  |  |
| 6                         | Age: _____ years or _____ - _____ years | Sex: <input type="checkbox"/> Male <input type="checkbox"/> Female | Relationship: <input type="checkbox"/> Spouse/partner <input type="checkbox"/> Parent <input type="checkbox"/> Child <input type="checkbox"/> Sibling <input type="checkbox"/> Grandparent <input type="checkbox"/> Grandchild<br><input type="checkbox"/> Classmate <input type="checkbox"/> Colleague <input type="checkbox"/> Boy/girl friend <input type="checkbox"/> Others <input type="checkbox"/> No relation / Unwilling to answer |  |  |  |
| 7                         | Age: _____ years or _____ - _____ years | Sex: <input type="checkbox"/> Male <input type="checkbox"/> Female | Relationship: <input type="checkbox"/> Spouse/partner <input type="checkbox"/> Parent <input type="checkbox"/> Child <input type="checkbox"/> Sibling <input type="checkbox"/> Grandparent <input type="checkbox"/> Grandchild<br><input type="checkbox"/> Classmate <input type="checkbox"/> Colleague <input type="checkbox"/> Boy/girl friend <input type="checkbox"/> Others <input type="checkbox"/> No relation / Unwilling to answer |  |  |  |
| 8                         | Age: _____ years or _____ - _____ years | Sex: <input type="checkbox"/> Male <input type="checkbox"/> Female | Relationship: <input type="checkbox"/> Spouse/partner <input type="checkbox"/> Parent <input type="checkbox"/> Child <input type="checkbox"/> Sibling <input type="checkbox"/> Grandparent <input type="checkbox"/> Grandchild<br><input type="checkbox"/> Classmate <input type="checkbox"/> Colleague <input type="checkbox"/> Boy/girl friend <input type="checkbox"/> Others <input type="checkbox"/> No relation / Unwilling to answer |  |  |  |
| 9                         | Age: _____ years or _____ - _____ years | Sex: <input type="checkbox"/> Male <input type="checkbox"/> Female | Relationship: <input type="checkbox"/> Spouse/partner <input type="checkbox"/> Parent <input type="checkbox"/> Child <input type="checkbox"/> Sibling <input type="checkbox"/> Grandparent <input type="checkbox"/> Grandchild<br><input type="checkbox"/> Classmate <input type="checkbox"/> Colleague <input type="checkbox"/> Boy/girl friend <input type="checkbox"/> Others <input type="checkbox"/> No relation / Unwilling to answer |  |  |  |
| 10                        | Age: _____ years or _____ - _____ years | Sex: <input type="checkbox"/> Male <input type="checkbox"/> Female | Relationship: <input type="checkbox"/> Spouse/partner <input type="checkbox"/> Parent <input type="checkbox"/> Child <input type="checkbox"/> Sibling <input type="checkbox"/> Grandparent <input type="checkbox"/> Grandchild<br><input type="checkbox"/> Classmate <input type="checkbox"/> Colleague <input type="checkbox"/> Boy/girl friend <input type="checkbox"/> Others <input type="checkbox"/> No relation / Unwilling to answer |  |  |  |

# Social contact survey relevant to the spread of infectious diseases

Name: \_\_\_\_\_

Participant ID: \_\_\_\_\_

Assigned date: \_\_\_\_\_ (DD) / \_\_\_\_\_ (MM)

## PART 3: CONTACT DIARY

### INSTRUCTIONS

- Record in the contact diary **every person** you have contact with on your assigned day, regardless of whether the contact was long or short, and whether you know the person or not.
- A contact is defined as:
  - EITHER **skin-to-skin contact** (physical contact, such as a handshake, hug, kiss)
  - OR **face-to-face conversation** with three or more words exchanged, within 1-2 meters (non-physical contact). Ignore conversations made over phones or on computers.
- If you contact the same person several times during the assigned day, only record him/her once, and record the total time you spent with that person over the entire day. So each person you meet during the day and have contact with should have one line in the diary.

### 12. The date you fill in the questionnaire:

\_\_\_\_\_ (DD) / \_\_\_\_\_ (MM)

### 13. For the purposes of this study, the day starts at 5 a.m. on the morning and ends at 5 a.m. the next morning.

Provide contact details by filling in the table:

| # | Name or description | Contact demographics                                                                                                                                                                                                                                                                                                                        | Contact details                                                                                                                                                                                                                                                                                                                                                                                                                                                                      | Record time | How often do you have contact with this person?                                                                                                                                                                                                                            |
|---|---------------------|---------------------------------------------------------------------------------------------------------------------------------------------------------------------------------------------------------------------------------------------------------------------------------------------------------------------------------------------|--------------------------------------------------------------------------------------------------------------------------------------------------------------------------------------------------------------------------------------------------------------------------------------------------------------------------------------------------------------------------------------------------------------------------------------------------------------------------------------|-------------|----------------------------------------------------------------------------------------------------------------------------------------------------------------------------------------------------------------------------------------------------------------------------|
| 1 |                     | Age: _____ or _____ – _____ years<br>Sex: <input type="checkbox"/> Male <input type="checkbox"/> Female<br>Member of :<br><input type="checkbox"/> Home <input type="checkbox"/> Student hall<br><input type="checkbox"/> School <input type="checkbox"/> Shared apartment<br><input type="checkbox"/> Work <input type="checkbox"/> Others | Contact type: <input type="checkbox"/> Skin-to-skin <input type="checkbox"/> Non-physical<br>Total time: <input type="checkbox"/> <5 mins<br><input type="checkbox"/> 5-14 mins<br><input type="checkbox"/> 15-59 mins<br><input type="checkbox"/> 1-4 hrs<br><input type="checkbox"/> > 4 hrs<br>Where: <input type="checkbox"/> House<br><input type="checkbox"/> Work<br><input type="checkbox"/> School<br><input type="checkbox"/> Transport<br><input type="checkbox"/> Others | ____ : ____ | How often in general:<br><input type="checkbox"/> Daily or almost daily<br><input type="checkbox"/> Once or twice a week<br><input type="checkbox"/> Once or twice a month<br><input type="checkbox"/> Less than once a month<br><input type="checkbox"/> Never met before |
| 2 |                     | Age: _____ or _____ – _____ years<br>Sex: <input type="checkbox"/> Male <input type="checkbox"/> Female<br>Member of :<br><input type="checkbox"/> Home <input type="checkbox"/> Student hall<br><input type="checkbox"/> School <input type="checkbox"/> Shared apartment<br><input type="checkbox"/> Work <input type="checkbox"/> Others | Contact type: <input type="checkbox"/> Skin-to-skin <input type="checkbox"/> Non-physical<br>Total time: <input type="checkbox"/> <5 mins<br><input type="checkbox"/> 5-14 mins<br><input type="checkbox"/> 15-59 mins<br><input type="checkbox"/> 1-4 hrs<br><input type="checkbox"/> > 4 hrs<br>Where: <input type="checkbox"/> House<br><input type="checkbox"/> Work<br><input type="checkbox"/> School<br><input type="checkbox"/> Transport<br><input type="checkbox"/> Others | ____ : ____ | How often in general:<br><input type="checkbox"/> Daily or almost daily<br><input type="checkbox"/> Once or twice a week<br><input type="checkbox"/> Once or twice a month<br><input type="checkbox"/> Less than once a month<br><input type="checkbox"/> Never met before |

Before submitting the contact diary, please make sure you have not left out any contacts.

We do ask you to include every contact you had, but if you were unable to include every single contact (for instance, because you work in a shop and have a large number of contacts in a day), please could you indicate this in Question 14?

### 14. Have you included all contacts in Question 13?

- Yes  
 No, approximately how many people you have left out: \_\_\_\_\_

-----END-----

Once again, thank you for your participation.

## References

- 1 Wu, J. T. *et al.* Inferring Influenza Infection Attack Rate from Seroprevalence Data. *PLOS Pathogens* **10**, e1004054, doi:10.1371/journal.ppat.1004054 (2014).
- 2 Mossong, J. *et al.* Social Contacts and Mixing Patterns Relevant to the Spread of Infectious Diseases. *PLOS Medicine* **5**, e74, doi:10.1371/journal.pmed.0050074 (2008).
